# Supplementary material for: Impairment of Endothelial Function by Aerosol From Marijuana Leaf Vaporizers
Source: PubMed Central journal article supplement — J Am Heart Assoc. 2023 Nov 28;12(23):e032969. doi: 10.1161/JAHA.123.032969 (PMC10727338; doi:10.1161/jaha.123.032969), 2023-11-28
Supplement: JAH3-12-e032969-s001.pdf [file JAH3-12-e032969-s001.pdf]

# **SUPPLEMENTAL MATERIAL**

**Table S1. Temperature comparisons between air and aerosol from Volcano with marijuana in the heating chamber vs. empty chamber, showing no significant difference between the two.**

| temp probe in heating chamber (°C) |       |        |
|------------------------------------|-------|--------|
|                                    | empty | MJ     |
|                                    | 163.9 | 165.0  |
|                                    | 168.3 | 166.7  |
| mean                               | 166.1 | 165.8  |
| SD                                 | 3.1   | 1.2    |
|                                    |       | p= 0.9 |
| temp probe in balloon (°C)         |       |        |
|                                    | empty | MJ     |
|                                    | 32.2  | 32.2   |
|                                    | 33.3  | 31.1   |
| mean                               | 32.8  | 31.7   |
| SD                                 | 0.8   | 0.8    |
|                                    |       | p= 0.3 |

Figure S1. Results from the two mixed-sex experiments shown in Figures 2 (top) and 4 (bottom) color coded to identify which rats were female (purple) and which were male (green).

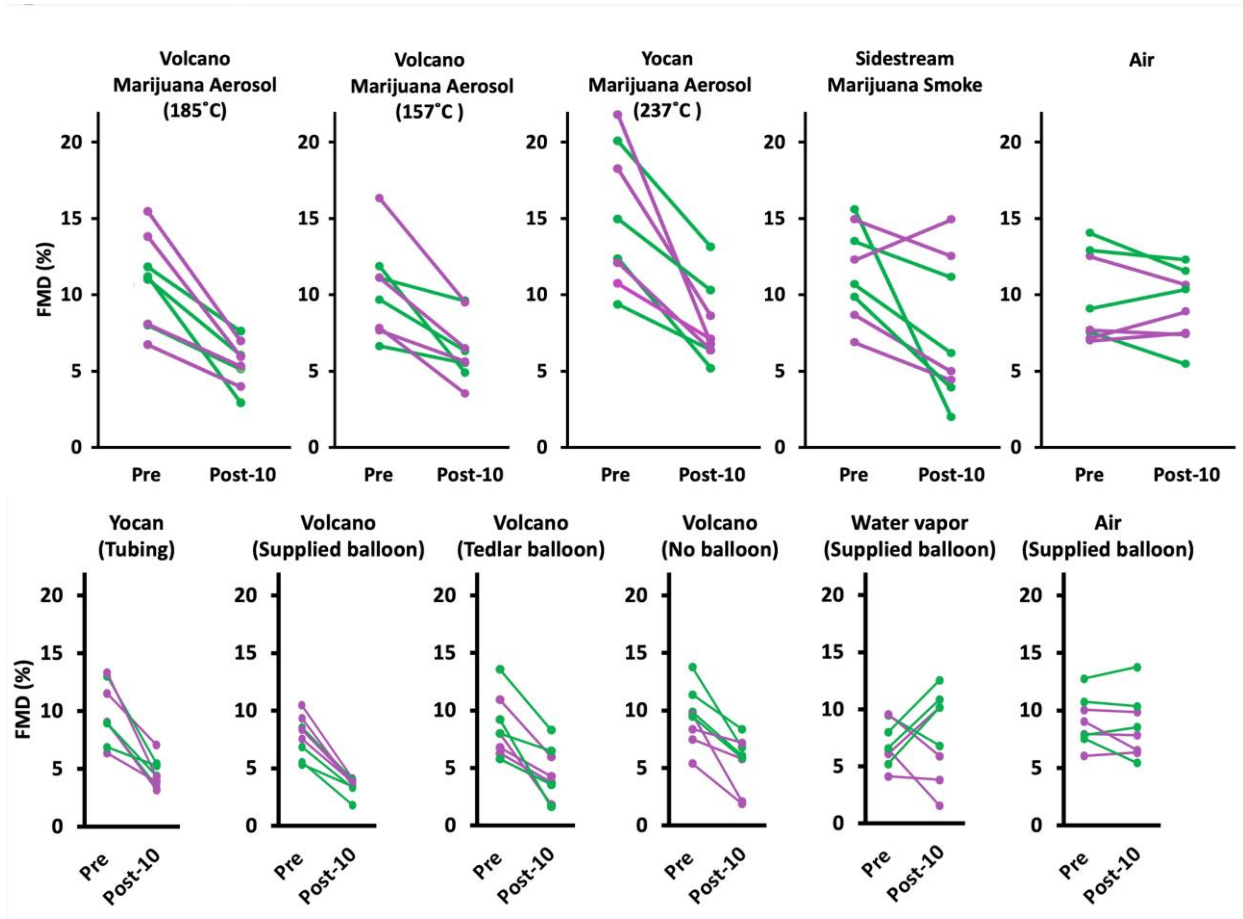

No obvious pattern was detected for influence of sex on baseline FMD or on impairment. For qualitative interpretation only; the study was not powered to detect changes in FMD for groups of n=4.
